# Supplementary material for: Magnetically separable functionalized graphene oxide decorated with magnetic cyclodextrin as an excellent adsorbent for dye removal
Source: Royal Society of Chemistry journal article supplement (doi:10.1039/c4ra06292b), 2014-08-06
Supplement: c4ra06292b1.pdf [file c4ra06292b1.pdf]

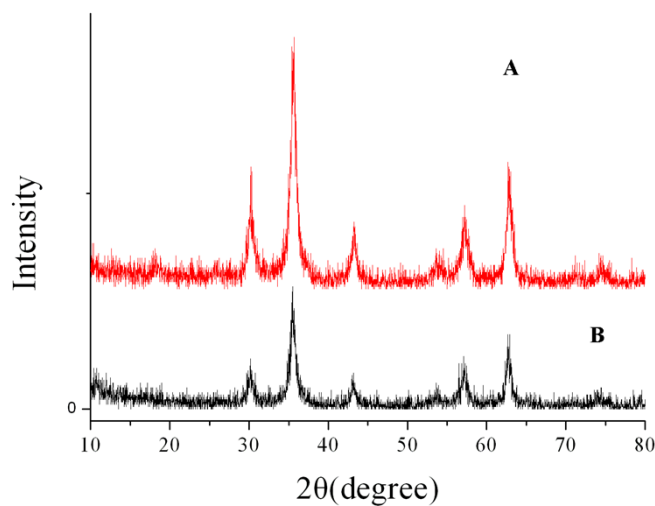

**Figure S1.** XRD patterns of the pure Fe<sub>3</sub>O<sub>4</sub> (A) and MCGO(B).

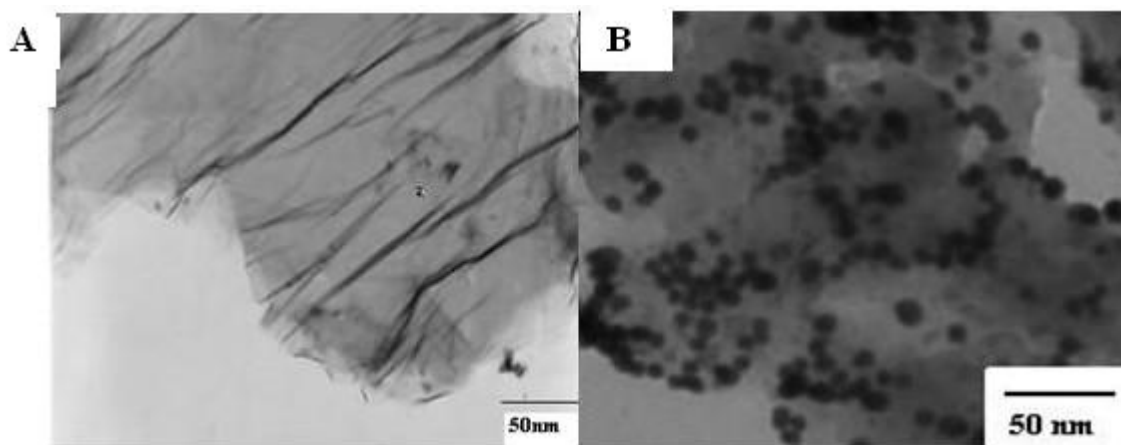

**Figure S2.** TEM images of GO (A) and MCGO(B).

We found that the stirring speed of 1000 r/min and stirring time of 36 h could not cause the partial breakage of the MCGO during the heavy metal ions removal experiments. Moreover, individual MCGO could suffer from the mechanical manipulation with strength as high as 1.5 N without partial breakage. These results suggest the mechanical strength of MCGO is excellent, benefiting from GO.
